# Supplementary material
Source: publisher site journal article supplement (https://www.dovepress.com/article/327736)

**Supplementary File**

**Transthyretin and Receptor for Advanced Glycation End Product’s Differential levels associated with the pathogenesis of Rheumatoid Arthritis**

**Monu1,2, Prachi Agnihotri1, Mohd Saquib1,2, Ashish Sarkar1,2, Debolina Chakraborty1,2, Uma Kumar3, Sagarika Biswas1***

1Council of Scientific and Industrial Research-Institute of Genomics and Integrative Biology (CSIR–IGIB), Mall Road, Delhi University Campus, Delhi, India,110007

2

Academy of Scientific and Innovative Research (AcSIR), Ghaziabad-201002, India

3All India Institute of Medical Sciences, Ansari Nagar, New Delhi - 110029, India

# *Corresponding author

Dr. Sagarika Biswas,Ph.D.

Sr.Principal Scientist

Integrative and Functional Biology Department CSIR- Institute of Genomics & Integrative Biology, Mall Road, Delhi-110 007, India

Tel: +91 11 27667602

& Fax #: +91-11-27667471,#9818004740

E-mail: sagarika.biswas@igib.res.in

**Supplementary materials and methods**

1. **2-DE and high-resolution mass spectrometry**

Three different pooled plasma samples (RA, HC n=5, each), same age and sex were used for 2-DE gel, repeated at least thrice. Plasma protein (70μg) was rehydrated in buffer [7M urea, 2M thiourea, 2% 3-[(3-Cholamidopropyl) dimethylammonio]-1-persulfonate (CHAPS), 0.2% (v/v) ampholytes and bromophenol blue], applied to 7 cm pH gradient strips (IPG), 4-7 pH (Bio-Rad, Germany). The isoelectric focusing (IEF) was carried out and the strips were equilibrated with 10 mg/ml DTT/40 mg/ml or Iodoacetamide (IAA)], separated in sodium dodecyl sulfate-polyacrylamide gel electrophoresis (SDS-PAGE) (Bio-Rad, Germany), silver stained (Merck Chemicals, Germany), and scanned using chemiDocTMMP imaging system (Bio- Red, USA)19.

The spots were excised, digested overnight at 37°C with trypsin (0.1μg/μl trypsin, Promega, USA), desalted and purified using ZipTip C18 (Millipore). Peptides (1μl) were mixed with sinapinic acid (1μl) onto the MS target plate, allowed to air dry. MS/MS spectra were procured over the mass scope of 10,000-20,000Da in reflector positive mode with 5600 laser shots force For inside alignment standard calibration mix 5 (Applied Biosystems) was used. For MS/MS precursor selection, least S/N (signal/noise) filter was set at 25 with a prohibition list for α-Cyano-4-hydroxycinnamic acid (CHCA) lattice peaks. Protein identification was considered statistically significant, probability based score (p<0.05) using mascot database search20.

1. **Non gel-based SWATH-MS acquisition**

Plasma samples were pooled (n=10) from each group (RA and HC) of equal age, sex and albumin was depleted using Pierce™ Albumin depletion kit (cat# 85160). A total of 70μg protein estimated by Bicinchoninic Acid (BCA), digested with sequencing grade trypsin (0.1μg/μl trypsin, Promega, USA) overnight at 37°C. The tryptic digested peptides were extracted twice with 50% ACN and 0.1% trifluoroacetic acid (TFA, Sigma Aldrich, USA) using moderate sonication, dried in a speed-vac to expel TFA/ACN. The digested peptides were fractionated using cation exchange chromatography using a SCX Cartridge (5 micron, 300 Å bead from ABSciex, USA).A step-gradient of increasing concentration of ammonium formate buffer (35mM, 50 mM, 75 mM, 100 mM, 125 mM, 150 mM, 250 mM and 350 mM ammonium formate, 30% v/v acetonitrile and 0.1% formic acid; pH = 2.9) was used to elute the peptides. For SWATH-MS quantitative acquisition, the proteins identified with two or more unique peptides with an unused score ≥2.0 were considered as describe earlier21.

1. **Enzyme linked immunosorbent assay analysis (ELISA)**

The indirect ELISA was performed using plasma n=100 (HC and RA) diluted (1μl/200μl)with coating buffer (sodium carbonate (Na2CO3, 0.01M) and sodium bicarbonate (NaHCO3, 0.035M) pH=9.6) into 96-well micro-titer plates (Thermo Scientific, Nunc, USA) and incubated overnight at 4ºC.The wells were blocked with 1% bovine serum albumin (BSA, Sigma-Aldrich, USA) for 1h at RT. Followed by washing (0.1% tween-20 in 1x PBS), wells were incubated for 2h with each primary anti-TTR and anti-RAGE (Santa cruz, USA) diluted 1/2000, antibodies respectively and HRP-conjugated secondary antibody (Jackson, USA) diluted 1/1000 incubated for 1h at RT. The reactions were developed using ortho-phenylene diamine (1mg/ml) and stopped by adding 3N H2SO4. The absorbances were observed at 495nm using ELISA reader (Spectra Max Plus 384, molecular devices, USA). For quantitative ELISA was also performed with HC and RA (n=24, each) using commercially available ELISA kit for RAGE (RayBio, ELH-RAGE) and TTR (Elabscience, E-EL-H2342) as per manufactures guideline19.

1. **Peripheral Blood Mononuclear Cell isolation, total RNA extraction and Quantitative Real-time PCR (qRT-PCR)**

The peripheral blood mononuclear cells (PBMCs) from HC (n=6), and RA (n=10) were isolated using the density gradient reagent. The fresh blood was overlaid on to a density gradient medium histopaque (Sigma-Aldrich, USA) at RT and centrifuged at 1500 × g for 30 min at 25°C by setting acceleration and deceleration rate at 9 and 3, respectively. PBMCs were aspirated carefully and diluted in Dulbecco’s Modified Eagle’s Medium (DMEM) containing 10% fetal bovine serum (FBS) in 1:1 ratio. After centrifugation at 1500 × g for 10 min at 25°C, the supernatant was decanted, and pellet was washed with PBS pH7.4, centrifuged again at 1500 × g for 10 min [15] and the total RNA from by using Tri-xtract Reagent (G-biosciences) according to the manufacturer’s protocol. For cDNA reverse transcription was used to produce cDNA by cDNA Synthesis Kit (G-biosciences). The human-specific primer sequences are listed in (supplementary table). The mRNA expression level was analyzed using Roch Light Cycler® 480 Instrument-II real-time PCR detection system. The data were normalized with respect to the constitutive gene GAPDH analyzed quantitatively using the 2-ΔΔCT formula.

1. **Labelling, detection and identification of glycated proteins using Flu-PAGE-LC-MS/MS**

The Flu-PAGE method comprises of boronic acid (BA) to form a reversible covalent complex with reducing sugars, amino acids that specifically interacts with modified proteins, enabling the glycation detection22. To detect the glycation in RA plasma, the fluorophore-appended boronic acids in SDS-PAGE (Flu-PAGE) method was performed at least in three experiments as described earlier22. The pooled plasma of RA and HC (n=3, each) were albumin depleted using Pierce™ Albumin Depletion Kit (cat#85160), protein concentration was diluted 10-fold in Milli-Q, and 9μL of diluted samples were incubated with 1μL working solution of boronic acid labelled with fluorescein and 1μL of fluorescein (control) working solution, incubated overnight at 40C. Glycated proteins were separated by 12% SDS-PAGE gel and scanned undera selective UV transilluminator filter into chemi-docTMMP (Bio-Rad) for image analysis. Contrast has been optimized for the analysis of scanned Flu-PAGE gels followed by sliver staining of Flu-PAGE gels and scanning under chemi-docTM MP (Bio-Rad) Image Lab 5.1. The fluorescent boronic acids labelled protein’s bands were excised and tryptic digested as described earlier. Similarly, for protein identification and quantification with two or more unique peptides with an unused score ≥2.0, 1% false discovery rate (FDR) were considered.

1. **Molecular docking of TTR-RAGE and validation**

Active site prediction of TTR protein was carried out by computed atlas of surface topography of proteins (CASTp) at <http://cast.engr.uic.edu> and for docking Autodock vina software was employed [23 24]. docking study was carried out for glucose ligand with target protein TTR (PDB: 1BMZ). Output files were prepared into PDBQT against TTR (PDB: 1BMZ). Grid centre coordinates were set at x, y, z, axes at 20.275, 29.774, 16.088 respectively after uploading the output files. Docked structure of TTR and glucose were considered as our main protein and MGO was considered as ligand. Interactions of ligands with protein were visualized using PYMOL and Discovery Studio Visualization tools.

**6.1 Protein Setup and ligands preparation**

The 3D structure of human TTR with Protein data bank, (PDB) ID: 1BMZ and human rage ligand-binding domain with PDB ID: 3CJJ were retrieved from Research Collaboratory for Structural Bioinformatics (RCSB) protein data bank with 2.00 Å and 1.85 Å resolution respectively. Files were saved as protein.pdb and rage.pdb for docking studies. The 3-D structure of the ligands, glucose and methylglyoxal (MGO) with PubChem CID 5793 and 880 respectively were retrieved from NCBI PubChem database [23] and were converted to PDB format using University of California, San Francisco (UCSF) Chimera.

1. **Isolation and in-vitro culture of RA fibroblast-like synoviocytes (RA-FLS)**

The synovium was removed from patients of RA and washed using 1XPBS and minced in DMEM (Life Technologies, Gaithersburg, MD, USA) supplemented with 10% FBS (Gibco, Grand Island, USA) contain penicillin and streptomycin (Gibco, Grand Island, USA). The synovial tissues were digested in culture media containing 1 mg/ml collagenase IV (Sigma, St. Louis, MO, USA) and incubated for 2 h at 37 °C. RA-FLS were cultured at 37 °C in 5% CO2. DMEM culture media were replenished every 2 days, and cells were sub-cultured when they reached 80% confluence and were used between passage 4 and 6.

1. **Co-immunoprecipitation and Western blot**

RA fibroblast like-synoviocytes (RA-FLS) cells were lysed using cold IP lysis buffer containing 25 mM Tris/HCl (pH 7.4), 150 mM NaCl, 1% NP-40, 1 mM EDTA, 5% glycerol (Thermo Scientific, Rockford, USA) with protease and phosphatase inhibitors (Sigma), followed by incubation at 4˚C for 1hr. The supernatant was collected by centrifugation (12,000 g, 30 min). The protein concentration was measured by Bradford protein assay (Thermo Scientific). For Co-Immunoprecipitation (Co-IP) assay, (Pierce Co-IP Kit thermo scientific) was used as per instruction. cell lysates were first pre-cleaned by incubation with control agarose resin for 2 hr at 4˚C, Then, primary antibodies (2μg) of anti-TTR (Santacruz, USA), anti- Spectrin-α II (Santacruz, USA), and/or anti-IgG (Santacruz, USA) were added and immobilized overnight at 4˚C, followed by adding 50μl AminoLink plus coupling resin. After washing with PBS, the respective immunoprecipitated proteins were eluted and separated by SDS-PAGE gel and transferred to NC membrane. The membrane was incubated with primary anti-RAGE diluted 1/5000 antibody and HRP-conjugated secondary antibody (Jackson, USA) for 2hr and 1hr respectively at RT. Immunoblot was developed using ECL (G-biosciesnce) and scanned under chemiDoc TMMP imaging system (Bio- Red, USA).

**Supplementary Results**

**6. Molecular docking analysis**

**TTR structure interaction with Glucose and MGO**

AGEs proteins are often accumulated intracellularly during inflammatory conditions [32], interfere with proteins normal function. The illustration of molecular interaction holding glucose on the active site of TTR are shown (Supplementary Figure 3A & 3B. Glucose interacts with TTR in a Pocket ID 2 with an area 128.502 A2, volume 94.771A3 and binding energy -5.6 Kcal/mol (supplementary table 5 and 6). The docking simulation of TTR with glucose resulted in 5-H bond at sites TYR; B:105, PHE; A:87, LYS; A:76, SER; A:85, SER; A:85 of TTR with bond lengths 2.10Å, 2.60Å, 2.27Å, 2.62Å and 2.34Å respectively (supplementary table 7). Similarly, molecular interaction holding MGO in the active site of TTR combined with glucose was carried out (supplementary Figure 3C). MGO interacts with TTR in a Pocket ID 8 with an area 24.214 A2, volume 5.163A3 and binding energy -3.1 Kcal/mol (supplementary Table 4 and 5). The docking simulation of MGO resulted in 2-H bond at the sites Threonine (THR); A:75, Tryptophan (TRP); A:79 of TTR with bond lengths 2.8Å and 1.8 Å respectively (supplementary table 7).

**TTR-RAGE Interaction in-silico analysis**

Molecular docking analysis of RAGE was performed by combining structure of TTR, glucose and MGO. It shows H-bonds between combined protein structure of TTR-glucose-MGO complex and RAGE (Supplementary Fig. 3A). Docking simulations of RAGE with TTR-glucose-MGO complex was carried out in HEX software and a binding energy -815.3 Kcal/mol was extracted out of interaction (supplementary table 8). RAGE interacted with glucose with 3-H bond at Lys; A, Lys; A and Lys; A sites with bond lengths 2.1Å, 2.3Å and 2.4Å, respectively. RAGE interacted with MGO with 2-H bond at sites THR; A, TRP; A with bond lengths 2.8Å and 1.8Å respectively (supplementary table 9). When RAGE was made to interact with TTR alone without MGO and glucose, no H-bond occurred between the two protein structures (supplementary Figure 3B). Similarly, S100P, a positive control when docked with RAGE showed binding energy -668.10 Kcal/mol and 1 H-bond with bond length of 2.9 Å between the two proteins (supplementary Figure 3C). The interaction thus showed that S100P being a glycated protein interacted effectively with RAGE.

**Supplementary Table Legends:**

**Supplementary Table Legends:**

**Supplementary Table 1. Demography clinical assessment of healthy control and patients with RA.**

**Supplementary Table 2.** Showing the list of Differential proteins (DPs) identified proteins from RA and HC plasma by 2-DE mass spectrometry analysis. Abbreviations: Rheumatoid Arthritis (RA); Healthy Control (HC); Two-Dimensional Electrophoresis (2-DE).

**Supplementary Table 3.** Showing the list of Differential proteins (DPs) identified proteins from RA and HC plasma by SWATH-mass spectrometry analysis.

**Supplementary Table 4: List of glycated proteins identified from RA plasma using Flu-PAGE and mass spectrometry (MS)** For statistical evaluation p<0.05 were used as a significance threshold in mascot search database and UniProt database (http://www.uniprot.org/) were searched for proteins Annotation; M.W.= Molecular Weight, Da=Dalton.

**Supplementary Table 5:** Active binding site of the target proteins PDB ID: 1BMZ predicted by using CASTp for binding with Glucose and Methylglyoxal (MGO).

**Supplementary Table 6:** Binding Energy & RMSDs obtained from docking of two ligands (glucose and MGO) with 1BMZ using auto-dock vina.

**Supplementary Table 7:** Hydrogen bonds and respective binding sites involved in the interaction of ligands Methylglyoxal (MGO) and Glucose with Transthyretin (TTR).

**Supplementary Table 8.** Binding Energy & RMSDs obtained from docking of 1BMZ bind with glucose and Methylglyoxal (MGO) as a complex with RAGE using Hex 8.0

**Supplementary Table 9.** Interaction of RAGE with TTR protein complex (TTR-Glucose-MGO).

**Supplementary Table 10.** The amplification primers sequences of a human specific gene.

**Supplementary Table 1: The clinical demography characteristics of healthy control, patient with RA and OA.**

| **S. No.** | **Patient’s characteristics** | **RA (n=100)** | **HC (n=50)** | **OA (n=24)** |
| --- | --- | --- | --- | --- |
| 1 | Age (yrs.) | 50 ± 5 | 45 ± 10 | 50 ± 5 |
| 2 | Sex (Female, Male) | F (60), M (40) | F (15), M (9) | F (28), M (22) |
| 3 | ESR (mm/hr) | 35 ± 5 | - | 15 ± 5 |
| 4 | RF (+ve/-ve) | +ve | - ve | ­ ve |
| 5 | CRP (mg/L) | 80 ±15 | 10 ± 5 | 30 ±10 |
| 6 | Tender Joint | 20±6 | - | 3 ± 1 |
| 7 | Swollen joints | 10±4 | - | 2 ± 1 |
| 8 | DAS-28 score | 6 ± 0.5 | - | - |
| 9 | Disease duration yrs. | 10 ± 5 | - | 6 ± 3 |
| 10 | Medication (Yes/No) | Yes | No | Yes |

RA: Rheumatoid arthritis; HC: Healthy control; OA Osteoarthritis; ESR: Erythrocyte sedimentation rate; RF: Rheumatoid factor; CRP: C-reactive protein; DAS-28: Disease Activity Score-28. The values are expressed as Mean ±SD

**Supplementary Table 2. Gel-based DPs identification using 2-DE-LC-MS/MS.** The list of DPs identified proteins from RA plasma by 2-DE and mass spectrometry analysis. The statistical evaluation p<0.05 were used as a significance threshold in mascot search database and Uniprot database (http://www.uniprot.org/) were searched for proteins.

| **Sr. no** | **Spots no.** | **% Cov** | **Accession no.** | **Identified proteins** | **Peptides (95%)** |
| --- | --- | --- | --- | --- | --- |
| 1 | 3 | 40.3 | tr|Q6P163|Q6P163_HUMAN | APOC2 | 2 |
| 2 | 4 | 29.1 | tr|B0YIW2|B0YIW2_HUMAN | Apolipoprotein C-III | 2 |
| 3 | 4 | 29.1 | tr|B0YIW2|B0YIW2_HUMAN | Apolipoprotein C-III | 2 |
| 4 | 1 | 59.2 | tr|E9KL36|E9KL36_HUMAN | Epididymis tissue sperm binding protein Li 4a | 7 |
| 5 |  | 8.1 | tr|Q8IUK7|Q8IUK7_HUMAN | ALB protein | 2 |
| 6 | 2 | 43.6 | tr|B0YIW2|B0YIW2_HUMAN | Apolipoprotein C-III | 4 |
| 7 | 5 | 49.6 | tr|B0YIW2|B0YIW2_HUMAN | Apolipoprotein C-III | 8 |
| 8 | 1 | 64 | tr|E9KL36|E9KL36_HUMAN | Epididymis tissue sperm binding protein Li 4a | 8 |
| 9 | 6 | 22.46 | tr|Q6GMX0|Q6GMX0_HUMAN | Uncharacterized protein OS=Homo sapiens PE=2 SV=1 | 4 |
| 10 | 7 | 35 | tr|P02647|APOA1_HUMAN | Apolipoprotein A-I | 2 |
| 11 | 8 | 45.13 | tr|A6XGL1|A6XGL1_HUMAN | Transthyretin OS=Homo sapiens PE=2 SV=1 | 3 |

**Supplementary Table 3.** Showing the list of DPs identified proteins from RA and HC plasma by SWATH-mass spectrometry analysis.

|  |  |  |  |  |  |  |  |
| --- | --- | --- | --- | --- | --- | --- | --- |
| **Sr. No** | **Acession No.** | **Gene ID** | **Proteins** | **Healthy** | **RA** | **ODD Ratio (RA/HC)** | **Up-regulation/Down-regulation** |
| 1 | sp|P01024|CO3_HUMAN | CO | Complement C3 | 1.76E+04 | 9.06E+04 | 5.13E+00 | Up-regulation |
| 2 | sp|P01023|A2MG_HUMAN | A2M | Alpha-2-macroglobulin | 1.33E+05 | 2.59E+05 | 1.95E+00 | Up-regulation |
| 3 | sp|P00450|CERU_HUMAN | CP | Ceruloplasmin | 3.62E+03 | 8.52E+03 | 2.35E+00 | Up-regulation |
| 4 | sp|P01009|A1AT_HUMAN | SERPINA1 | Alpha-1-antitrypsin | 6.26E+02 | 5.33E+03 | 8.52E+00 | Up-regulation |
| 5 | tr|A0A0A0MS08|A0A0A0MS08_HUMAN | IGHG1 | Immunoglobulin heavy constant gamma 1 (Fragment) | 5.45E+04 | 9.50E+04 | 1.74E+00 | Up-regulation |
| 6 | sp|P02671|FIBA_HUMAN | FGA | Fibrinogen alpha chain | 3.68E+03 | 1.43E+04 | 3.88E+00 | Up-regulation |
| 7 | sp|P08603|CFAH_HUMAN | CFH | Complement factor H | 1.41E+04 | 4.43E+04 | 3.15E+00 | Up-regulation |
| 8 | sp|P02675|FIBB_HUMAN | FGB | Fibrinogen beta chain | 2.20E+03 | 5.50E+03 | 2.50E+00 | Up-regulation |
| 9 | sp|P00738|HPT_HUMAN | HP | Haptoglobin | 2.73E+03 | 7.05E+03 | 2.58E+00 | Up-regulation |
| 10 | sp|P02679|FIBG_HUMAN | FGG | Fibrinogen gamma chain | 1.93E+03 | 4.34E+03 | 2.25E+00 | Up-regulation |
| 11 | sp|P00747|PLMN_HUMAN | PLG | Plasminogen | 1.65E+03 | 4.97E+03 | 3.01E+00 | Up-regulation |
| 12 | tr|B7ZKJ8|B7ZKJ8_HUMAN | ITIH4 | ITIH4 protein | 5.88E+03 | 1.06E+04 | 1.80E+00 | Up-regulation |
| 13 | sp|P02774|VTDB_HUMAN | GC | Vitamin D-binding protein | 2.02E+03 | 7.89E+03 | 3.91E+00 | Up-regulation |
| 14 | sp|P00734|THRB_HUMAN | F2 | Prothrombin | 2.50E+03 | 1.69E+04 | 6.75E+00 | Up-regulation |
| 15 | tr|Q5T985|Q5T985_HUMAN | ITIH2 | Inter-alpha-trypsin inhibitor heavy chain H2 | 2.47E+02 | 4.97E+03 | 2.01E+01 | Up-regulation |
| 16 | sp|P02790|HEMO_HUMAN | HPX | Hemopexin | 4.20E+03 | 1.87E+04 | 4.45E+00 | Up-regulation |
| 17 | sp|P06727|APOA4_HUMAN | APOA4 | Apolipoprotein A-IV | 9.10E+03 | 2.48E+04 | 2.72E+00 | Up-regulation |
| 18 | sp|P04003|C4BPA_HUMAN | C4BPA | C4b-binding protein alpha chain | 6.74E+02 | 5.80E+03 | 8.61E+00 | Up-regulation |
| 19 | sp|P01008|ANT3_HUMAN | SERPINC1 | Antithrombin-III | 5.98E+03 | 1.80E+04 | 3.01E+00 | Up-regulation |
| 20 | sp|P01011|AACT_HUMAN | SERPINA3 | Alpha-1-antichymotrypsin | 1.98E+04 | 9.74E+04 | 4.92E+00 | Up-regulation |
| 21 | sp|P19827|ITIH1_HUMAN | ITIH1 | Inter-alpha-trypsin inhibitor heavy chain H1 | 1.37E+03 | 4.03E+03 | 2.95E+00 | Up-regulation |
| 22 | sp|P06396|GELS_HUMAN | GSN | Gelsolin | 5.09E+02 | 1.72E+03 | 3.37E+00 | Up-regulation |
| 23 | sp|P02765|FETUA_HUMAN | AHSG | Alpha-2-HS-glycoprotein | 2.45E+04 | 1.36E+05 | 5.54E+00 | Up-regulation |
| 24 | sp|P01042|KNG1_HUMAN | KNG1 | Kininogen-1 | 4.15E+03 | 2.54E+04 | 6.13E+00 | Up-regulation |
| 25 | sp|P04217|A1BG_HUMAN | A1BG | Alpha-1B-glycoprotein | 1.35E+05 | 2.74E+05 | 2.03E+00 | Up-regulation |
| 26 | sp|P02749|APOH_HUMAN | APOH | Beta-2-glycoprotein 1 | 5.23E+02 | 4.83E+03 | 9.24E+00 | Up-regulation |
| 27 | sp|P02649|APOE_HUMAN | APOE | Apolipoprotein E | 2.18E+03 | 5.08E+03 | 2.32E+00 | Up-regulation |
| 28 | sp|P05155|IC1_HUMAN | SERPING1 | Plasma protease C1 inhibitor | 2.86E+03 | 1.07E+04 | 3.74E+00 | Up-regulation |
| 29 | sp|P43652|AFAM_HUMAN | AFM | Afamin | 9.48E+02 | 8.61E+03 | 9.08E+00 | Up-regulation |
| 30 | sp|P13671|CO6_HUMAN | C6 | Complement component C6 | 1.65E+02 | 1.04E+03 | 6.29E+00 | Up-regulation |
| 31 | sp|P10909|CLUS_HUMAN | CLU | Clusterin | 2.92E+03 | 7.09E+03 | 2.43E+00 | Up-regulation |
| 32 | sp|P02763|A1AG1_HUMAN | ORM1 | Alpha-1-acid glycoprotein 1 | 1.20E+05 | 4.99E+05 | 4.17E+00 | Up-regulation |
| 33 | tr|V9GYM3|V9GYM3_HUMAN | APOA2 | Apolipoprotein A-II | 5.77E+04 | 1.01E+05 | 1.75E+00 | Up-regulation |
| 34 | sp|O75882|ATRN_HUMAN | ATRN | Attractin | 6.74E+02 | 2.50E+03 | 3.72E+00 | Up-regulation |
| 35 | sp|P25311|ZA2G_HUMAN | AZGP1 | Zinc-alpha-2-glycoprotein | 1.77E+04 | 4.77E+04 | 2.70E+00 | Up-regulation |
| 36 | sp|P04196|HRG_HUMAN | HRG | Histidine-rich glycoprotein | 8.81E+02 | 2.92E+03 | 3.31E+00 | Up-regulation |
| 37 | sp|P02760|AMBP_HUMAN | AMBP | Protein AMBP | 1.20E+03 | 5.07E+03 | 4.23E+00 | Up-regulation |
| 38 | sp|Q96PD5|PGRP2_HUMAN | Q96PD5 | N-acetylmuramoyl-L-alanine amidase | 3.96E+03 | 2.05E+04 | 5.18E+00 | Up-regulation |
| 39 | sp|P08697|A2AP_HUMAN | SERPINF2 | Alpha-2-antiplasmin | 5.23E+02 | 8.91E+02 | 1.70E+00 | Up-regulation |
| 40 | sp|P20742|PZP_HUMAN | PZP | Pregnancy zone protein | 1.06E+03 | 3.59E+03 | 3.39E+00 | Up-regulation |
| 41 | tr|A0A286YEY4|A0A286YEY4_HUMAN | IGHG2 | Immunoglobulin heavy constant gamma 2 (Fragment) | 1.96E+03 | 1.04E+04 | 5.31E+00 | Up-regulation |
| 42 | sp|P09871|C1S_HUMAN | C1S | Complement C1s subcomponent | 3.75E+03 | 1.04E+04 | 2.77E+00 | Up-regulation |
| 43 | sp|P02748|CO9_HUMAN | C9 | Complement component C9 | 1.07E+03 | 4.42E+03 | 4.12E+00 | Up-regulation |
| 44 | sp|P02766|TTHY_HUMAN | TTR | Transthyretin | 1.07E+03 | 1.77E+04 | 1.64E+01 | Up-regulation |
| 45 | tr|G3XAM2|G3XAM2_HUMAN | CFI | Complement factor I | 2.25E+03 | 3.70E+03 | 1.65E+00 | Up-regulation |
| 46 | sp|P02750|A2GL_HUMAN | LRG1 | Leucine-rich alpha-2-glycoprotein | 4.11E+03 | 1.24E+04 | 3.02E+00 | Up-regulation |
| 47 | sp|P60709|ACTB_HUMAN | ACTB | Actin, cytoplasmic 1 OS=Homo sapiens OX=9606 GN=ACTB PE=1 SV=1 | 2.36E+03 | 5.30E+03 | 2.24E+00 | Up-regulation |
| 48 | sp|P01880|IGHD_HUMAN | IGHD | Immunoglobulin heavy constant delta OS=Homo sapiens OX=9606 GN=IGHD PE=1 SV=3 | 3.39E+02 | 6.87E+02 | 2.03E+00 | Up-regulation |
| 49 | tr|A0A087WW43|A0A087WW43_HUMAN | ITIH3 | Inter-alpha-trypsin inhibitor heavy chain H3 OS=Homo sapiens OX=9606 GN=ITIH3 PE=1 SV=1 | 1.06E+03 | 1.73E+04 | 1.64E+01 | Up-regulation |
| 50 | sp|P27169|PON1_HUMAN | PON1 | Serum paraoxonase/arylesterase 1 OS=Homo sapiens OX=9606 GN=PON1 PE=1 SV=3 | 3.26E+03 | 1.08E+04 | 3.31E+00 | Up-regulation |
| 51 | sp|P04004|VTNC_HUMAN | VTN | Vitronectin OS=Homo sapiens OX=9606 GN=VTN PE=1 SV=1 | 1.54E+03 | 2.65E+04 | 1.72E+01 | Up-regulation |
| 52 | sp|Q08380|LG3BP_HUMAN | LGALS3BP | Galectin-3-binding protein OS=Homo sapiens OX=9606 GN=LGALS3BP PE=1 SV=1 | 8.64E+02 | 3.53E+03 | 4.08E+00 | Up-regulation |
| 53 | sp|P36955|PEDF_HUMAN | SERPINF1 | Pigment epithelium-derived factor OS=Homo sapiens OX=9606 GN=SERPINF1 PE=1 SV=4 | 1.14E+03 | 2.68E+03 | 2.35E+00 | Up-regulation |
| 54 | sp|P08185|CBG_HUMAN | SERPINA6 | Corticosteroid-binding globulin OS=Homo sapiens OX=9606 GN=SERPINA6 PE=1 SV=1 | 1.17E+03 | 9.41E+03 | 8.04E+00 | Up-regulation |
| 55 | tr|H0YAC1|H0YAC1_HUMAN | KLKB1 | Plasma kallikrein (Fragment) OS=Homo sapiens OX=9606 GN=KLKB1 PE=1 SV=1 | 5.09E+02 | 1.91E+03 | 3.76E+00 | Up-regulation |
| 56 | sp|P05543|THBG_HUMAN | SERPINA7 | Thyroxine-binding globulin OS=Homo sapiens OX=9606 GN=SERPINA7 PE=1 SV=2 | 5.64E+03 | 3.07E+04 | 5.44E+00 | Up-regulation |
| 57 | sp|P51884|LUM_HUMAN | LUM | Lumican OS=Homo sapiens OX=9606 GN=LUM PE=1 SV=2 | 7.41E+03 | 1.54E+04 | 2.08E+00 | Up-regulation |
| 58 | tr|Q5VY30|Q5VY30_HUMAN | RBP4 | Retinol-binding protein OS=Homo sapiens OX=9606 GN=RBP4 PE=1 SV=2 | 5.20E+03 | 2.87E+04 | 5.52E+00 | Up-regulation |
| 59 | sp|P22792|CPN2_HUMAN | CPN2 | Carboxypeptidase N subunit 2 OS=Homo sapiens OX=9606 GN=CPN2 PE=1 SV=3 | 2.26E+03 | 3.54E+03 | 1.56E+00 | Up-regulation |
| 60 | tr|C9JF17|C9JF17_HUMAN | APOD | Apolipoprotein D (Fragment) OS=Homo sapiens OX=9606 GN=APOD PE=1 SV=1 | 2.18E+03 | 1.52E+04 | 6.98E+00 | Up-regulation |
| 61 | sp|P35858|ALS_HUMAN | P35858 | Insulin-like growth factor-binding protein complex acid labile subunit OS=Homo sapiens OX=9606 GN=IGFALS PE=1 SV=1 | 5.09E+02 | 1.65E+03 | 3.24E+00 | Up-regulation |
| 62 | sp|P05546|HEP2_HUMAN | SERPIND1 | Heparin cofactor 2 OS=Homo sapiens OX=9606 GN=SERPIND1 PE=1 SV=3 | 3.30E+02 | 2.13E+03 | 6.45E+00 | Up-regulation |
| 63 | tr|A0A286YES1|A0A286YES1_HUMAN | IGHG3 | Immunoglobulin heavy constant gamma 3 (Fragment) OS=Homo sapiens OX=9606 GN=IGHG3 PE=1 SV=1 | 2.94E+03 | 1.09E+04 | 3.72E+00 | Up-regulation |
| 64 | sp|P80108|PHLD_HUMAN | P80108 | Phosphatidylinositol-glycan-specific phospholipase D OS=Homo sapiens OX=9606 GN=GPLD1 PE=1 SV=3 | 1.13E+03 | 7.03E+03 | 6.23E+00 | Up-regulation |
| 65 | sp|P19652|A1AG2_HUMAN | ORM2 | Alpha-1-acid glycoprotein 2 OS=Homo sapiens OX=9606 GN=ORM2 PE=1 SV=2 | 4.33E+04 | 1.14E+05 | 2.63E+00 | Up-regulation |
| 66 | tr|B0YIW2|B0YIW2_HUMAN | APOC3 | Apolipoprotein C-III OS=Homo sapiens OX=9606 GN=APOC3 PE=1 SV=1 | 5.96E+03 | 1.03E+04 | 1.73E+00 | Up-regulation |
| 67 | tr|F5H7G1|F5H7G1_HUMAN | C8B | Complement component C8 beta chain OS=Homo sapiens OX=9606 GN=C8B PE=1 SV=1 | 3.33E+02 | 8.23E+02 | 2.47E+00 | Up-regulation |
| 68 | sp|P69905|HBA_HUMAN | HBA1 | Hemoglobin subunit alpha OS=Homo sapiens OX=9606 GN=HBA1 PE=1 SV=2 | 8.14E+03 | 2.51E+05 | 3.08E+01 | Up-regulation |
| 69 | sp|P07360|CO8G_HUMAN | C8G | Complement component C8 gamma chain OS=Homo sapiens OX=9606 GN=C8G PE=1 SV=3 | 1.93E+02 | 6.63E+02 | 3.43E+00 | Up-regulation |
| 70 | sp|P05160|F13B_HUMAN | F13B | Coagulation factor XIII B chain OS=Homo sapiens OX=9606 GN=F13B PE=1 SV=3 | 1.08E+03 | 6.80E+03 | 6.29E+00 | Up-regulation |
| 71 | sp|P01591|IGJ_HUMAN | JCHAIN | Immunoglobulin J chain OS=Homo sapiens OX=9606 GN=JCHAIN PE=1 SV=4 | 1.37E+03 | 5.06E+04 | 3.69E+01 | Up-regulation |
| 72 | tr|E9PHK0|E9PHK0_HUMAN | CLEC3B | Tetranectin OS=Homo sapiens OX=9606 GN=CLEC3B PE=1 SV=1 | 1.19E+03 | 2.27E+03 | 1.90E+00 | Up-regulation |
| 73 | tr|A0A096LPE2|A0A096LPE2_HUMAN | SAA2-SAA4 | SAA2-SAA4 readthrough OS=Homo sapiens OX=9606 GN=SAA2-SAA4 PE=4 SV=1 | 1.23E+03 | 3.47E+03 | 2.81E+00 | Up-regulation |
| 74 | sp|P04264|K2C1_HUMAN | P04264 | Keratin, type II cytoskeletal 1 OS=Homo sapiens OX=9606 GN=KRT1 PE=1 SV=6 | 6.33E+02 | 2.93E+03 | 4.62E+00 | Up-regulation |
| 75 | sp|A0A0B4J1Y9|HV372_HUMAN | IGHV3-72 | Immunoglobulin heavy variable 3-72 OS=Homo sapiens OX=9606 GN=IGHV3-72 PE=3 SV=1 | 5.86E+03 | 8.89E+03 | 1.52E+00 | Up-regulation |
| 76 | sp|P43251|BTD_HUMAN | BTD | Biotinidase OS=Homo sapiens OX=9606 GN=BTD PE=1 SV=2 | 1.01E+03 | 1.68E+03 | 1.67E+00 | Up-regulation |
| 77 | tr|A0A0J9YY99|A0A0J9YY99_HUMAN | N/A | Uncharacterized protein (Fragment) OS=Homo sapiens OX=9606 PE=1 SV=1 | 9.63E+02 | 4.22E+03 | 4.39E+00 | Up-regulation |
| 78 | sp|P29622|KAIN_HUMAN | SERPINA4 | Kallistatin OS=Homo sapiens OX=9606 GN=SERPINA4 PE=1 SV=3 | 5.21E+02 | 2.61E+03 | 5.01E+00 | Up-regulation |
| 79 | sp|O14791|APOL1_HUMAN | APOL1 | Apolipoprotein L1 OS=Homo sapiens OX=9606 GN=APOL1 PE=1 SV=5 | 2.47E+02 | 2.44E+03 | 9.87E+00 | Up-regulation |
| 80 | sp|P23083|HV102_HUMAN | IGHV1-2 | Immunoglobulin heavy variable 1-2 OS=Homo sapiens OX=9606 GN=IGHV1-2 PE=1 SV=2 | 3.58E+02 | 6.60E+03 | 1.84E+01 | Up-regulation |
| 81 | sp|P02747|C1QC_HUMAN | C1QC | Complement C1q subcomponent subunit C OS=Homo sapiens OX=9606 GN=C1QC PE=1 SV=3 | 4.24E+02 | 1.51E+03 | 3.56E+00 | Up-regulation |
| 82 | tr|I3L145|I3L145_HUMAN | SHBG | Sex hormone-binding globulin OS=Homo sapiens OX=9606 GN=SHBG PE=1 SV=1 | 3.44E+02 | 6.60E+02 | 1.92E+00 | Up-regulation |
| 83 | sp|P0DOY2|IGLC2_HUMAN | IGLC2 | Immunoglobulin lambda constant 2 OS=Homo sapiens OX=9606 GN=IGLC2 PE=1 SV=1 | 1.25E+04 | 2.95E+04 | 2.36E+00 | Up-regulation |
| 84 | tr|H9KV75|H9KV75_HUMAN | ACTN1 | Alpha-actinin-1 OS=Homo sapiens OX=9606 GN=ACTN1 PE=1 SV=1 | 2.78E+02 | 8.23E+02 | 2.97E+00 | Up-regulation |
| 85 | tr|K7ERI9|K7ERI9_HUMAN | APOC1 | Apolipoprotein C-I (Fragment) OS=Homo sapiens OX=9606 GN=APOC1 PE=1 SV=1 | 1.05E+03 | 5.47E+03 | 5.21E+00 | Up-regulation |
| 86 | sp|O95445|APOM_HUMAN | O95445 | Apolipoprotein M OS=Homo sapiens OX=9606 GN=APOM PE=1 SV=2 | 1.29E+04 | 3.71E+04 | 2.87E+00 | Up-regulation |
| 87 | sp|P01624|KV315_HUMAN | IGKV3-15 | Immunoglobulin kappa variable 3-15 OS=Homo sapiens OX=9606 GN=IGKV3-15 PE=1 SV=2 | 4.26E+02 | 3.00E+03 | 7.04E+00 | Up-regulation |
| 88 | sp|A0A0A0MS15|HV349_HUMAN | IGHV3-49 | Immunoglobulin heavy variable 3-49 OS=Homo sapiens OX=9606 GN=IGHV3-49 PE=3 SV=1 | 3.21E+03 | 1.08E+04 | 3.37E+00 | Up-regulation |
| 89 | sp|P00742|FA10_HUMAN | F10 | Coagulation factor X OS=Homo sapiens OX=9606 GN=F10 PE=1 SV=2 | 3.44E+02 | 7.44E+02 | 2.16E+00 | Up-regulation |
| 90 | tr|D6R934|D6R934_HUMAN | C1QB | Complement C1q subcomponent subunit B OS=Homo sapiens OX=9606 GN=C1QB PE=1 SV=1 | 7.46E+02 | 2.16E+03 | 2.90E+00 | Up-regulation |
| 91 | sp|Q9NZP8|C1RL_HUMAN | C1RL | Complement C1r subcomponent-like protein OS=Homo sapiens OX=9606 GN=C1RL PE=1 SV=2 | 7.51E+02 | 2.39E+03 | 3.18E+00 | Up-regulation |
| 92 | sp|P0C0L5|CO4B_HUMAN | C4B | Complement C4-B OS=Homo sapiens OX=9606 GN=C4B PE=1 SV=2 | 6.01E+01 | 4.47E+02 | 7.43E+00 | Up-regulation |
| 93 | sp|P01700|LV147_HUMAN | IGLV1-47 | Immunoglobulin lambda variable 1-47 OS=Homo sapiens OX=9606 GN=IGLV1-47 PE=1 SV=2 | 2.20E+03 | 5.73E+03 | 2.60E+00 | Up-regulation |
| 94 | sp|P06312|KV401_HUMAN | IGKV4-1 | Immunoglobulin kappa variable 4-1 OS=Homo sapiens OX=9606 GN=IGKV4-1 PE=1 SV=1 | 2.70E+04 | 6.78E+04 | 2.51E+00 | Up-regulation |
| 95 | tr|E9PFZ2|E9PFZ2_HUMAN | CP | Ceruloplasmin OS=Homo sapiens OX=9606 GN=CP PE=1 SV=1 | 3.44E+02 | 1.17E+03 | 3.40E+00 | Up-regulation |
| 96 | tr|E9PAQ1|E9PAQ1_HUMAN | CFP | Properdin OS=Homo sapiens OX=9606 GN=CFP PE=1 SV=1 | 1.79E+02 | 5.63E+02 | 3.14E+00 | Up-regulation |
| 97 | sp|P0DP07|HV431_HUMAN | IGHV4-31 | Immunoglobulin heavy variable 4-31 OS=Homo sapiens OX=9606 GN=IGHV4-31 PE=3 SV=1 | 1.30E+04 | 3.29E+04 | 2.52E+00 | Up-regulation |
| 98 | sp|P35908|K22E_HUMAN | KRT2 | Keratin, type II cytoskeletal 2 epidermal OS=Homo sapiens OX=9606 GN=KRT2 PE=1 SV=2 | 2.61E+02 | 4.47E+02 | 1.71E+00 | Up-regulation |
| 99 | sp|P08519|APOA_HUMAN | LPA | Apolipoprotein(a) OS=Homo sapiens OX=9606 GN=LPA PE=1 SV=1 | 6.19E+02 | 1.85E+03 | 2.99E+00 | Up-regulation |
| 100 | tr|H0Y8D1|H0Y8D1_HUMAN | PRSS1 | Trypsin-1 (Fragment) OS=Homo sapiens OX=9606 GN=PRSS1 PE=1 SV=1 | 4.66E+03 | 1.15E+05 | 2.46E+01 | Up-regulation |
| 101 | sp|P01721|LV657_HUMAN | IGLV6-57 | Immunoglobulin lambda variable 6-57 OS=Homo sapiens OX=9606 GN=IGLV6-57 PE=1 SV=2 | 1.55E+03 | 3.98E+03 | 2.57E+00 | Up-regulation |
| 102 | sp|P06681|CO2_HUMAN | C2 | Complement C2 OS=Homo sapiens OX=9606 GN=C2 PE=1 SV=2 | 7.02E+02 | 2.20E+03 | 3.14E+00 | Up-regulation |
| 103 | sp|A0A0C4DH69|KV109_HUMAN | IGKV1-9 | Immunoglobulin kappa variable 1-9 OS=Homo sapiens OX=9606 GN=IGKV1-9 PE=3 SV=1 | 1.13E+02 | 8.58E+02 | 7.61E+00 | Up-regulation |
| 104 | tr|A0A087WXI2|A0A087WXI2_HUMAN | FCGBP | IgGFc-binding protein (Fragment) OS=Homo sapiens OX=9606 GN=FCGBP PE=1 SV=2 | 4.14E+02 | 3.20E+03 | 7.73E+00 | Up-regulation |
| 105 | sp|A0A0B4J1X5|HV374_HUMAN | IGHV3-74 | Immunoglobulin heavy variable 3-74 OS=Homo sapiens OX=9606 GN=IGHV3-74 PE=3 SV=1 | 5.44E+02 | 1.70E+03 | 3.13E+00 | Up-regulation |
| 106 | tr|A0A0G2JSC0|A0A0G2JSC0_HUMAN | IGLV5-45 | Immunoglobulin lambda variable 5-45 (Fragment) OS=Homo sapiens OX=9606 GN=IGLV5-45 PE=1 SV=1 | 5.96E+02 | 1.82E+03 | 3.05E+00 | Up-regulation |
| 107 | tr|A0A075B7B8|A0A075B7B8_HUMAN | IGHV3OR16-12 | Immunoglobulin heavy variable 3/OR16-12 (non-functional) (Fragment) OS=Homo sapiens OX=9606 GN=IGHV3OR16-12 PE=1 SV=1 | 1.84E+02 | 8.23E+02 | 4.48E+00 | Up-regulation |
| 108 | sp|A0A0C4DH34|HV428_HUMAN | IGHV4-28 | Immunoglobulin heavy variable 4-28 OS=Homo sapiens OX=9606 GN=IGHV4-28 PE=3 SV=1 | 2.37E+03 | 6.02E+03 | 2.54E+00 | Up-regulation |
| 109 | tr|E5RGB5|E5RGB5_HUMAN | BIN3 | Bridging integrator 3 OS=Homo sapiens OX=9606 GN=BIN3 PE=4 SV=1 | 1.22E+03 | 3.78E+03 | 3.10E+00 | Up-regulation |
| 110 | tr|A0A0U1RQV4|A0A0U1RQV4_HUMAN | ROCK1 | Rho-associated protein kinase 1 OS=Homo sapiens OX=9606 GN=ROCK1 PE=1 SV=1 | 1.40E+03 | 2.92E+05 | 2.09E+02 | Up-regulation |
| 111 | sp|P55056|APOC4_HUMAN | APOC4 | Apolipoprotein C-IV OS=Homo sapiens OX=9606 GN=APOC4 PE=1 SV=1 | 4.92E+02 | 1.47E+03 | 3.00E+00 | Up-regulation |
| 112 | tr|M0QZ22|M0QZ22_HUMAN | SAMD4B | Protein Smaug homolog 2 OS=Homo sapiens OX=9606 GN=SAMD4B PE=1 SV=1 | 3.21E+02 | 1.34E+03 | 4.17E+00 | Up-regulation |
| 113 | tr|I3L4X8|I3L4X8_HUMAN | ITGB3 | Integrin beta OS=Homo sapiens OX=9606 GN=ITGB3 PE=3 SV=1 | 1.65E+02 | 1.41E+03 | 8.56E+00 | Up-regulation |
| 114 | tr|A0A1W2PQ80|A0A1W2PQ80_HUMAN | IGLV10-54 | Immunoglobulin lambda variable 10-54 OS=Homo sapiens OX=9606 GN=IGLV10-54 PE=1 SV=1 | 1.65E+02 | 5.44E+03 | 3.30E+01 | Up-regulation |
| 115 | sp|Q6BEB4|SP5_HUMAN | SP5 | Transcription factor Sp5 OS=Homo sapiens OX=9606 GN=SP5 PE=2 SV=1 | 3.34E+02 | 2.07E+03 | 6.19E+00 | Up-regulation |
| 116 | sp|Q5H9J7|BEX5_HUMAN | BEX5 | Protein BEX5 OS=Homo sapiens OX=9606 GN=BEX5 PE=1 SV=1 | 2.47E+02 | 2.16E+03 | 8.74E+00 | Up-regulation |
| 117 | sp|P33151|CADH5_HUMAN | CDH5 | Cadherin-5 OS=Homo sapiens OX=9606 GN=CDH5 PE=1 SV=5 | 1.03E+03 | 3.15E+03 | 3.04E+00 | Up-regulation |
| 118 | sp|A0A0B4J1X8|HV343_HUMAN | IGHV3-43 | Immunoglobulin heavy variable 3-43 OS=Homo sapiens OX=9606 GN=IGHV3-43 PE=3 SV=1 | 5.08E+02 | 8.93E+02 | 1.76E+00 | Up-regulation |
| 119 | sp|A0A0C4DH25|KVD20_HUMAN | IGKV3D-20 | Immunoglobulin kappa variable 3D-20 OS=Homo sapiens OX=9606 GN=IGKV3D-20 PE=3 SV=1 | 6.59E+02 | 1.46E+03 | 2.21E+00 | Up-regulation |
| 120 | sp|P02768|ALBU_HUMAN | ALB | Serum albumin OS=Homo sapiens OX=9606 GN=ALB PE=1 SV=2 | 1.84E+05 | 1.10E+05 | 6.01E-01 | Down-regulation |
| 121 | sp|P04114|APOB_HUMAN | APOB | Apolipoprotein B-100 OS=Homo sapiens OX=9606 GN=APOB PE=1 SV=2 | 5.32E+03 | 3.59E+03 | 6.76E-01 | Down-regulation |
| 122 | sp|P02787|TRFE_HUMAN | TF | Serotransferrin OS=Homo sapiens OX=9606 GN=TF PE=1 SV=3 | 1.00E+06 | 1.54E+05 | 1.54E-01 | Down-regulation |
| 123 | sp|P02647|APOA1_HUMAN | APOA1 | Apolipoprotein A-I OS=Homo sapiens OX=9606 GN=APOA1 PE=1 SV=1 | 1.49E+06 | 1.03E+06 | 6.91E-01 | Down-regulation |
| 124 | sp|P01031|CO5_HUMAN | C5 | Complement C5 OS=Homo sapiens OX=9606 GN=C5 PE=1 SV=4 | 4.36E+03 | 2.18E+03 | 5.00E-01 | Down-regulation |
| 125 | sp|P68871|HBB_HUMAN | HBB | Hemoglobin subunit beta OS=Homo sapiens OX=9606 GN=HBB PE=1 SV=2 | 7.19E+06 | 6.09E+06 | 8.47E-01 | Down-regulation |
| 126 | tr|B4DPQ0|B4DPQ0_HUMAN | C1R | Complement C1r subcomponent OS=Homo sapiens OX=9606 GN=C1R PE=1 SV=1 | 5.13E+03 | 4.41E+03 | 8.60E-01 | Down-regulation |
| 127 | sp|O43866|CD5L_HUMAN | CD5L | CD5 antigen-like OS=Homo sapiens OX=9606 GN=CD5L PE=1 SV=1 | 1.37E+04 | 1.11E+04 | 8.09E-01 | Down-regulation |
| 128 | tr|J3KRP0|J3KRP0_HUMAN | CNDP1 | Beta-Ala-His dipeptidase OS=Homo sapiens OX=9606 GN=CNDP1 PE=1 SV=2 | 1.14E+03 | 1.00E+03 | 8.84E-01 | Down-regulation |
| 129 | sp|O75636|FCN3_HUMAN | FCN3 | Ficolin-3 OS=Homo sapiens OX=9606 GN=FCN3 PE=1 SV=2 | 5.01E+02 | 4.11E+02 | 8.20E-01 | Down-regulation |
| 130 | sp|P01619|KV320_HUMAN | IGKV3-20 | Immunoglobulin kappa variable 3-20 OS=Homo sapiens OX=9606 GN=IGKV3-20 PE=1 SV=2 | 3.30E+03 | 2.39E+03 | 7.25E-01 | Down-regulation |
| 131 | sp|P01599|KV117_HUMAN | IGKV1-17 | Immunoglobulin kappa variable 1-17 OS=Homo sapiens OX=9606 GN=IGKV1-17 PE=1 SV=2 | 1.32E+03 | 4.11E+02 | 3.11E-01 | Down-regulation |
| 132 | sp|P00748|FA12_HUMAN | F12 | Coagulation factor XII OS=Homo sapiens OX=9606 GN=F12 PE=1 SV=3 | 2.24E+03 | 2.03E+03 | 9.05E-01 | Down-regulation |
| 133 | sp|P01782|HV309_HUMAN | IGHV3-9 | Immunoglobulin heavy variable 3-9 OS=Homo sapiens OX=9606 GN=IGHV3-9 PE=1 SV=2 | 2.43E+03 | 2.09E+03 | 8.62E-01 | Down-regulation |
| 134 | tr|A0A087X0Q4|A0A087X0Q4_HUMAN | IGKV2-40 | Immunoglobulin kappa variable 2-40 OS=Homo sapiens OX=9606 GN=IGKV2-40 PE=1 SV=1 | 3.18E+03 | 3.00E+03 | 9.45E-01 | Down-regulation |
| 135 | tr|B1AKG0|B1AKG0_HUMAN | CFHR1 | Complement factor H-related protein 1 OS=Homo sapiens OX=9606 GN=CFHR1 PE=1 SV=1 | 9.37E+02 | 6.51E+02 | 6.94E-01 | Down-regulation |
| 136 | sp|P04433|KV311_HUMAN | IGKV3-11 | Immunoglobulin kappa variable 3-11 OS=Homo sapiens OX=9606 GN=IGKV3-11 PE=1 SV=1 | 1.39E+04 | 1.10E+03 | 7.88E-02 | Down-regulation |
| 137 | tr|Q5VVP7|Q5VVP7_HUMAN | CRP | C-reactive protein OS=Homo sapiens OX=9606 GN=CRP PE=1 SV=1 | 4.92E+02 | 4.12E+02 | 8.37E-01 | Down-regulation |
| 138 | sp|P01766|HV313_HUMAN | IGHV3-13 | Immunoglobulin heavy variable 3-13 OS=Homo sapiens OX=9606 GN=IGHV3-13 PE=1 SV=2 | 2.80E+02 | 2.62E+02 | 9.37E-01 | Down-regulation |
| 139 | tr|E9PQD6|E9PQD6_HUMAN | SAA1 | Serum amyloid A protein OS=Homo sapiens OX=9606 GN=SAA1 PE=1 SV=1 | 1.37E+03 | 4.11E+02 | 3.00E-01 | Down-regulation |
| 140 | tr|J3QS41|J3QS41_HUMAN | HELZ | Probable helicase with zinc finger domain OS=Homo sapiens OX=9606 GN=HELZ PE=1 SV=1 | 3.30E+02 | 3.16E+02 | 9.60E-01 | Down-regulation |
| 141 | tr|H0YLF3|H0YLF3_HUMAN | B2M | Beta-2-microglobulin (Fragment) OS=Homo sapiens OX=9606 GN=B2M PE=1 SV=1 | 4.34E+02 | 4.11E+02 | 9.47E-01 | Down-regulation |
| 142 | sp|A0A0B4J1U7|HV601_HUMAN | IGHV6-1 | Immunoglobulin heavy variable 6-1 OS=Homo sapiens OX=9606 GN=IGHV6-1 PE=3 SV=1 | 4.46E+03 | 4.37E+03 | 9.79E-01 | Down-regulation |

**Supplementary Table 4. List of glycated proteins identified from RA plasma using Flu-PAGE and mass spectrometry (MS)**

| **S. No** | **Band Labelled** | **Accession / Database no.** | **Proteins** | **Peptides Score** | **Mass (Da)** |
| --- | --- | --- | --- | --- | --- |
| 1 | A-8 | sp|P01023|A2MG_HUMAN | Alpha-2-macroglobulin | 142 | 1,63,291 |
| 2 | B-8 | sp|P02787|TRFE_HUMAN | Serotransferrin | 104 | 77,064 |
| 3 | C-8 | sp|P02787|TRFE_HUMAN | Serotransferrin | 10 | 77,064 |
| 4 | D-8 | tr|A0A024R6I7|A0A024R6I7_HUMAN | Alpha-1-antitrypsin | 79 | 46,708 |
| 5 | E-8 | tr|J3QR68|J3QR68_HUMAN | Haptoglobin (Fragment) | 81 | 45,041 |
| 6 | F-8 | sp|P02647|APOA1_HUMAN | Apolipoprotein A-I | 21 | 30,778 |
| 7 | G-8 | sp|P00738|HPT_HUMAN | Haptoglobin | 18 | 45,205 |
| 8 | H-8 | tr|A0A087WV45|A0A087WV45_HUMAN | Transthyretin | 6 | 15,120 |
| 9 | I-8 | sp|P68871|HBB_HUMAN | Hemoglobin subunit beta | 39 | 15,998 |

**Supplementary Table 5: Active binding site of the target proteins PDB ID: 1BMZ predicted by using CASTp for binding with Glucose and MGO.**

| **Interaction** | **Active site** | **Chain** | **Binding sites** |
| --- | --- | --- | --- |
| TTR interaction with Glucose | Pocket ID: 2  Area= 128.502A2  Volume=94.771A3 | A | 76LYS, 80LYS, 85SER, 86PRO, 87PHE, 114TYR |
| B | 96THR, 98ASN, 99ASP, 100SER, 101GLY, 103ARG, 105TYR, 122VAL |
| TTR interaction with MGO | Pocket ID: 8  Area = 24.214,  Volume = 5.163 | A | 75THR, 79TRP, 86PRO, 88HIS, 111LEU, 112SER, 113PRO, 115SER, 116TYR |

**Supplementary Table 6: Binding Energy & RMSDs obtained from docking of two ligands (glucose and MGO) with 1BMZ using Autodock vina.**

| **Name of ligand** | **PubChem CID** | **Docking mode** | **Energy (Kcal/mol)** | **RMSD (lower bound root mean square)** | **RMSD (upper bound root mean square)** |
| --- | --- | --- | --- | --- | --- |
| Glucose | 5793 | 1  2  3 | -5.6  -5.4  -5.3 | 0.000  31.375  31.945 | 0.000  33.209  33.632 |
| MGO | 880 | 1  2  3 | -3.1  -3.0  -2.8 | 0.000  1.350  24.110 | 0.000  2.646  24.486 |

**Supplementary Table 7: Hydrogen bonds and respective binding sites involved in interaction of ligands Glucose and MGO with TTR (1BMZ).**

| **Ligands with 1BMZ** | **No. of H-Bond** | **Binding site** | **Bond length** (Å) |
| --- | --- | --- | --- |
| TTR-Glucose | 5 | TYR; B:105 | 2.10 |
| PHE; A:87 | 2.60 |
| LYS; A:76 | 2.27 |
| SER; A:85 | 2.62 |
| SER; A:85 | 2.34 |
| TTR-MGO | 2 | THR; A:75 | 2.8 |
| TRP; A:79 | 1.8 |

**Supplementary Table 8. Binding Energy & RMSDs obtained from docking of 1BMZ bind with glucose and MGO as complex with RAGE using Hex 8.0**

| **Name of ligand** | **PDB ID** | **Clst** | **Sol** | **E-total**  **Kcal/mol** | **E-shape** | **E-force** | **E-air** | **BMP** | **RMS** |
| --- | --- | --- | --- | --- | --- | --- | --- | --- | --- |
| RAGE | 3CJJ | 1  1  1 | 1  6  8 | -815.3  -726.2  -703.4 | -815.3  -726.2  -703.4 | 0.0  0.0  0.0 | 0.0  0.0  0.0 | -1  -1  -1 | -1.00  -1.00  -1.00 |

**Supplementary Table 9. Interaction of RAGE with TTR protein**

| **RAGE interaction with complex** | **No of H-Bond** | **Binding site** | **Bond length (Å)** |
| --- | --- | --- | --- |
| Interaction with Glucose + TTR | 3 | LYS; A | 2.1 |
| LYS; A | 2.3 |
| LYS; A | 2.4 |
| Interaction with MGO + TTR | 2 | THR; A | 2.8 |
| TRP; A | 1.8 |
| Interaction with Glucose+ MGO +TTR | 5 | LYS; A | 2.1 |
| LYS; A | 2.3 |
| LYS; A | 2.4 |
| THR; A | 2.8 |
| TRP; A | 1.8 |

**Supplementary Table 10.** The amplification primers sequences of human specific gene.

| **Sr.** | **Gene Name** | **Primer Sequence Forward** | **Primer Sequence Reverse** |
| --- | --- | --- | --- |
| 1 | TTR | 5′-ATGGCTTCTCATCGTCTGCT-3′ | 5′-TGTCATCAGCAGCCTTTCTG-3′ |
| 2 | RAGE | 5’ CAGTAGCTCCTGGTGGAACCGTAAC-3’ | 5’-CCTATCTCAGGGAGGATCAGCACAG-3’ |
| 3 | IL-6 | 5’-GGTACATCCTCGACGGCATCT-3’ | 5’-GTGCCTCTTTGCTGCTTTCAC-3’ |
| 4 | TNF-α | 5’-CCCCAGGGACCTCTCTCTAATC-3’ | 5’-GGTTTGCTACAACATGGGCTACA-3’ |
| 5 | GAPDH | 5’-GAAGGTGAAGGTCGGAGTC-3’ | 5’-GAAGATGGTGATGGGATTTC-3’ |

**Supplementary Figures Legends**

**Supplementary Figure 1. Glycated proteins from RA and healthy plasma (with or without albumin depletion) proteins detection by Flu-PAGE analysis**: **Left panel:** Coomassie blue staining of the Flu-PAGE gels showing RA plasma proteins resolved by SDS-PAGE according to molecular weight (Mw) shown in markers (Lane-1). **Right panel:** The Lane-3 marks white star representing fluorescein-boronic acid-treated healthy control samples (HC-1FB), and protein treated with fluorescein as a control for RA sample (RA-1F) in Lane-4. Whereas white star marked (glycated proteins) when RA plasma incubated with a fluorescein-boronic acid (Lane-4 to Lane-7). Lane-8 of Flu-PAGE analysis showed when no albumin was depleted in RA plasma and incubated with a fluorescein-boronic acid. Abbreviations: Healthy control-1 fluorescein-boronic acid-treated (HC-1FB); Rheumatoid Arthritis-1 fluorescein-treated (RA-1F).

**Supplementary Figure 2: *In-silico* analysis of TTR by molecular docking: A)** Interaction of TTR with glucose (Red) showing H-bonds. **B)** Interaction of TTR with Glucose (Red) with sites of binding and H-bond interactions. **C)** Interaction of MGO with TTR and Glucose complex. MGO and Glucose are represented in blue color. Abbreviations: Transthyretin (TTR); Methylglyoxal (MGO).

**Supplementary Figure 3: A) RAGE Interaction with TTR-Glucose-MGO complex and *in-vitro* TTR-RAGE analysis.** Blue dots showing H-bonds. Glucose is represented in green and MGO in blue color. **B)** Interaction of RAGE and TTR protein without glucose & MGO. **C)** Interaction of RAGE with known S100P glycated proteins protein as a reference control. **D)** Co-immunoprecipitation of TTR and RAGE receptors in RA-FLS. The cell lysate was immunoprecipitated with an anti-TTR antibody (Lane 1). Spectrin-α II (Lane 2), normal IgG (Lane 7), as a control, and then immunoblotted with anti-RAGE antibody and was compared with input RA1(Lane 3) & RA2 (Lane 8) two different total RA-FLS cell lysate to confirm molecular weight of RAGE. The last flow through FT-IP TTR, spectrin-α II & IgG (Lane 4, 5 & 6) respectively before elution. Abbreviations: Transthyretin (TTR); Methylglyoxal (MGO). Receptors for advanced glycation end products (RAGE); RA fibroblast like-synoviocytes (RA-FLS).

**Supplementary figure 1.**


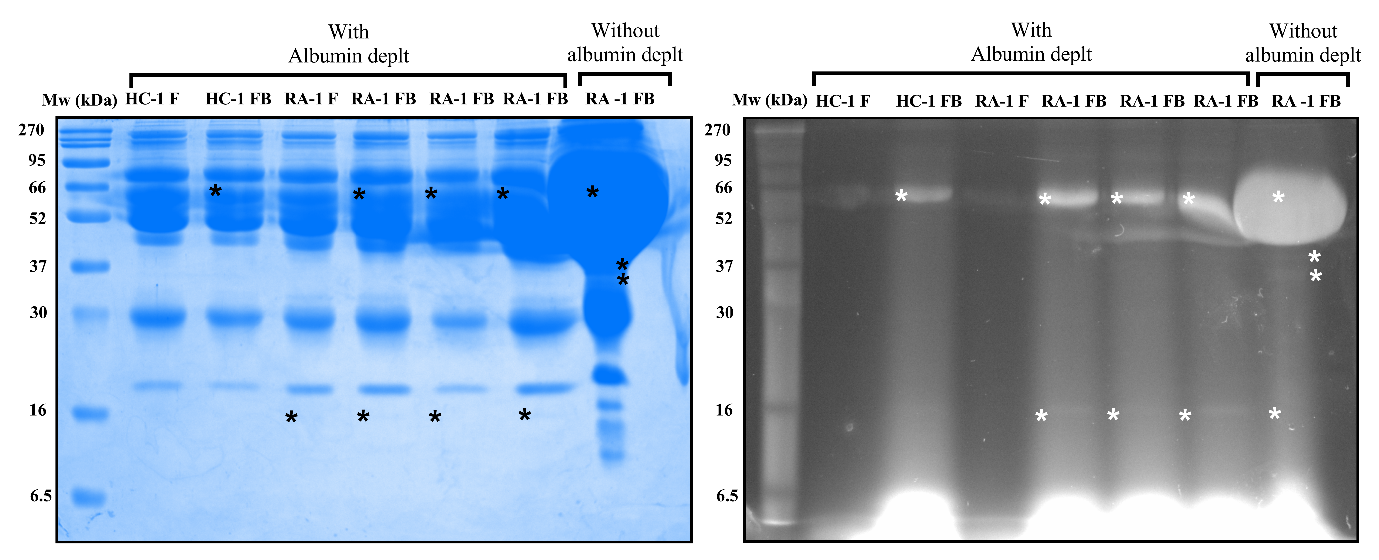


**Supplementary figure 2. A, B & C**

**Supplementary figure 3: A, B, C & D**


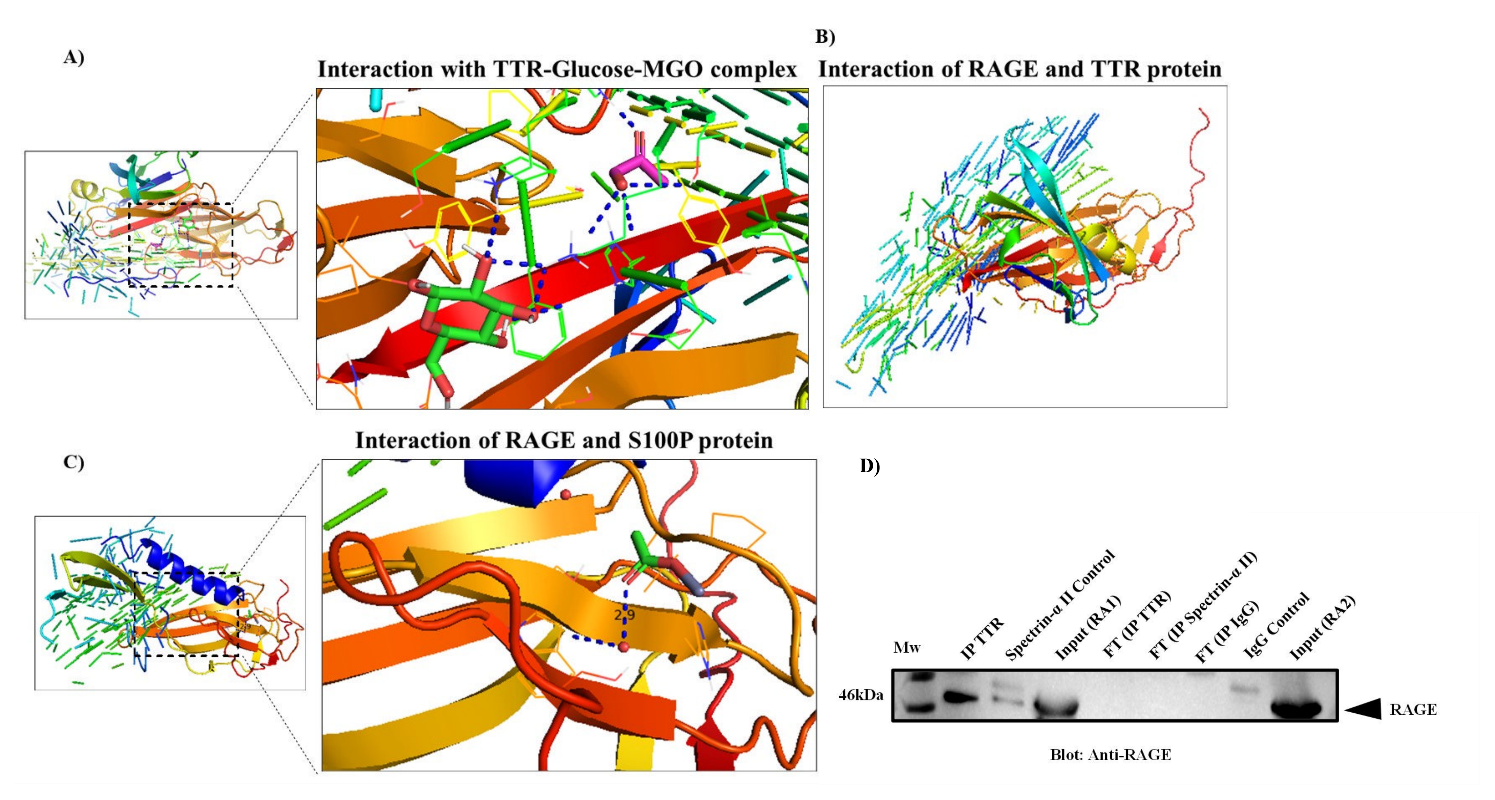

Supplement: Supplementary file 1 [file get_supplementary_file.php]
